# Supplementary material for: Characterization of tissue-specific differential DNA methylation suggests distinct modes of positive and negative gene expression regulation
Source: PubMed Central journal article supplement (PMC4331481; doi:10.1186/s12864-015-1271-4), 2015-02-05

## Supplemental Figure 1

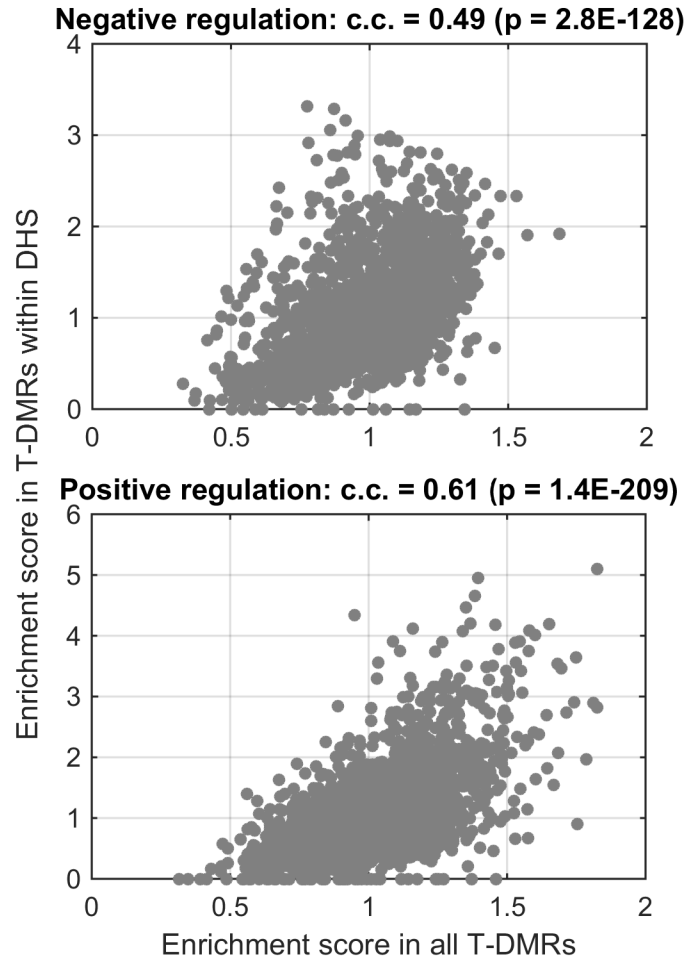

Supplemental Figure 2

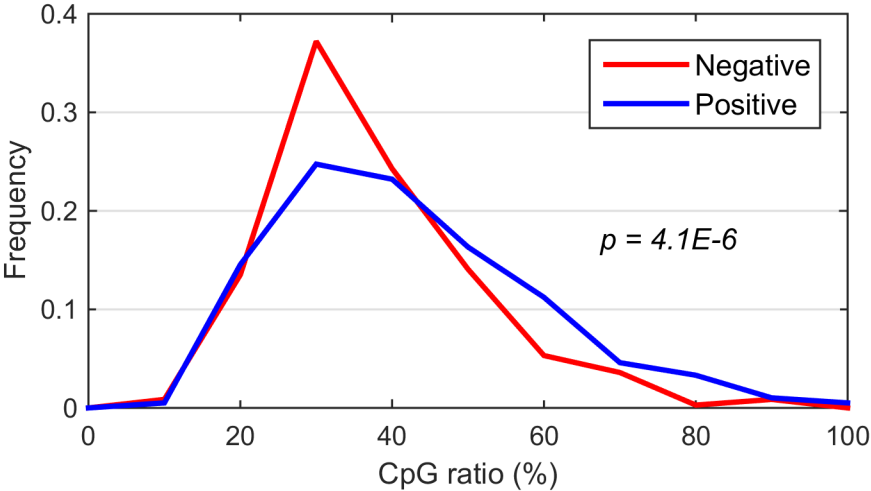

### Supplemental Figure 3

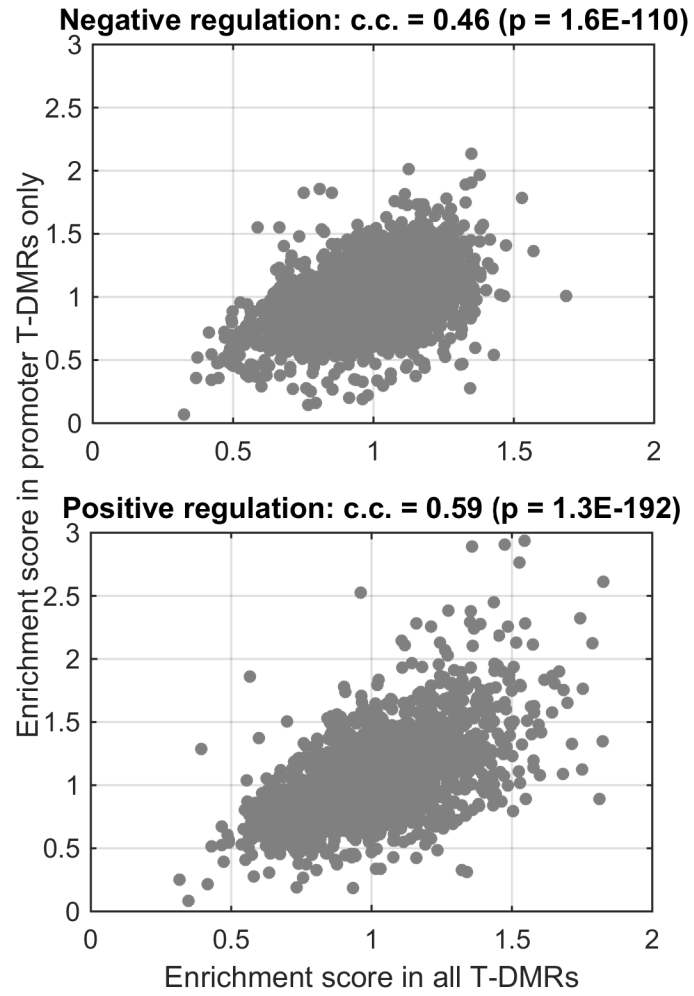

Supplement: 12864_2015_1271_MOESM2_ESM.pdf [file 12864_2015_1271_MOESM2_ESM.pdf]
